# Supplementary material
Source: PubMed Central journal article supplement (PMC3485706)
Supplement: AEM.02120-12_zam999103788so1.pdf [file AEM.02120-12_zam999103788so1.pdf]

## Supplemental Material

### Genomic and transcriptomic studies of an RDX-degrading actinobacterium

Hao-Ping Chen<sup>1,2</sup>, Song-Hua Zhu<sup>1</sup>, Israël Casabon<sup>1</sup>, Steven J. Hallam<sup>1</sup>, Fiona H. Crocker<sup>3</sup>, William W. Mohn<sup>1</sup>, Karl J. Indest<sup>3</sup>, Lindsay D. Eltis<sup>1</sup>

<sup>1</sup>Department of Microbiology & Immunology, Life Sciences Institute, University of British Columbia, Vancouver, British Columbia, Canada.

<sup>2</sup>Current address: Department of Biochemistry, School of Medicine, Tzu Chi University, Hualien 970, Taiwan.

<sup>3</sup>U.S. Army Engineer Research and Development Center, Environmental Laboratory, Vicksburg, Mississippi.

Table S1. Predicted ORFs that were revised on pGKT2

|          |                                                                                                                                                                                                                                                             |
|----------|-------------------------------------------------------------------------------------------------------------------------------------------------------------------------------------------------------------------------------------------------------------|
| deleted  | KTR9_4813, KTR9_4830, KTR9_4845, KTR9_4870, KTR9_4929, KTR9_4930                                                                                                                                                                                            |
| inserted | KTR9_5096, KTR9_5103, KTR9_5108, KTR9_5109, KTR9_5110, KTR9_5117, KTR9_5124, KTR9_5134, KTR9_5140, KTR9_5146, KTR9_5154, KTR9_5158, KTR9_5164, KTR9_5170, KTR9_5171, KTR9_5172, KTR9_5173, KTR9_5189, KTR9_5202, KTR9_5213, KTR9_5218, KTR9_5236, KTR9_5254 |

Table S2. Classes of metabolic pathways predicted to occur in *Gordonia* sp. KTR9, *G. bronchialis* 3410<sup>T</sup>, and *R. jostii* RHA1<sup>a</sup>.

| Type of pathway                                                 | KTR9<br>(5.9 Mb) | 3410 <sup>T</sup><br>(5.3 Mb) | RHA1<br>(9.7 Mb) |
|-----------------------------------------------------------------|------------------|-------------------------------|------------------|
| Fatty acid and lipid catabolism                                 | 5                | 4                             | 6                |
| Fatty acid and lipid biosynthesis                               | 20               | 12                            | 21               |
| Amines and polyamines catabolism                                | 14               | 7                             | 17               |
| Aromatic compound catabolism                                    | 10               | 7                             | 34               |
| Cofactors, prosthetic groups,<br>electron carriers biosynthesis | 58               | 50                            | 54               |
| Amino acid biosynthesis                                         | 50               | 34                            | 44               |
| Total                                                           | 277              | 206                           | 338              |

<sup>a</sup>Data from [www.biocyc.org](http://www.biocyc.org).

Table S3. Genes differentially regulated in KTR9 growing on RDX vs.  $\text{NH}_4^+$ . (Fold-change > 2 and  $P < 0.5$ ).

| Locus tag    | Annotation                                                     | Fold change | P-value  |
|--------------|----------------------------------------------------------------|-------------|----------|
| Up-regulated |                                                                |             |          |
| KTR9_0011    | bifunctional deaminase-reductase domain-containing protein     | 2.03        | 0.45     |
| KTR9_0014    | Ribosomal protein L31                                          | 2.42        | 0.49     |
| KTR9_0055    | Predicted metal-dependent hydrolase                            | 2.23        | 0.11     |
| KTR9_0111    | hypothetical protein                                           | 2.31        | 0.25     |
| KTR9_0131    | hypothetical protein                                           | 3.28        | 5.76E-04 |
| KTR9_0136    | Predicted membrane protein                                     | 2.34        | 2.14E-09 |
| KTR9_0164    | hypothetical protein                                           | 2.14        | 0.37     |
| KTR9_0181    | glyoxalase/bleomycin resistance protein/dioxygenase            | 2.12        | 0.49     |
| KTR9_0302    | hypothetical protein                                           | 5.59        | 0.26     |
| KTR9_0310    | Transcriptional regulator                                      | 2.73        | 0.19     |
| KTR9_0314    | hypothetical protein                                           | 2.36        | 0.03     |
| KTR9_0337    | hypothetical protein                                           | 2.19        | 0.28     |
| KTR9_0416    | hypothetical protein                                           | 2.03        | 1.31E-06 |
| KTR9_0425    | hypothetical protein                                           | 2.51        | 0.13     |
| KTR9_0426    | Flp pilus assembly protein, ATPase CpaF                        | 2.17        | 0.2      |
| KTR9_0427    | type II secretion system F domain protein                      | 2.31        | 0.38     |
| KTR9_0428    | Flp pilus assembly protein                                     | 2.4         | 0.43     |
| KTR9_0432    | hypothetical protein                                           | 3.29        | 0.15     |
| KTR9_0435    | Cold shock proteins                                            | 2.16        | 1.73E-03 |
| KTR9_0440    | Predicted transcriptional regulators                           | 3.05        | 0.33     |
| KTR9_0464    | Transcriptional regulators                                     | 2.59        | 6.77E-03 |
| KTR9_0519    | Multisubunit $\text{Na}^+/\text{H}^+$ antiporter, MnhG subunit | 10.93       | 0.07     |
| KTR9_0574    | Transcriptional regulator                                      | 3.37        | 0.01     |
| KTR9_0691    | hypothetical protein                                           | 2.24        | 0.01     |
| KTR9_0696    | endoribonuclease L-PSP                                         | 2.18        | 0.44     |
| KTR9_0706    | Predicted aminoglycoside phosphotransferase                    | 2           | 0.3      |
| KTR9_0732    | Protein-tyrosine phosphatase                                   | 5.42        | 0.34     |

|           |                                                                              |       |          |
|-----------|------------------------------------------------------------------------------|-------|----------|
| KTR9_0769 | DNA-directed RNA polymerase specialized sigma subunit, sigma24 -like protein | 2.38  | 3.74E-03 |
| KTR9_0771 | Transcriptional regulator                                                    | 2.18  | 0.44     |
| KTR9_0827 | Acyl-CoA dehydrogenase                                                       | 2.03  | 0.47     |
| KTR9_0988 | hypothetical protein                                                         | 2.05  | 0.16     |
| KTR9_0989 | hypothetical protein                                                         | 10.05 | 1.68E-08 |
| KTR9_0990 | permease for cytosine/purines, uracil, thiamine, allantoin transporter       | 86.19 | 1.55E-14 |
| KTR9_0991 | N-methylhydantoinase B / acetone carboxylase, alpha subunit                  | 95.35 | 0        |
| KTR9_0992 | N-methylhydantoinase A / acetone carboxylase, beta subunit                   | 83.9  | 8.22E-15 |
| KTR9_1021 | hypothetical protein                                                         | 11.19 | 0.36     |
| KTR9_1030 | DNA-directed DNA polymerase                                                  | 2.4   | 0.01     |
| KTR9_1105 | hypothetical protein                                                         | 2.54  | 3.11E-04 |
| KTR9_1134 | hypothetical protein                                                         | 9.83  | 0.14     |
| KTR9_1173 | conserved hypothetical protein, DUF1469 superfamily                          | 2.57  | 0.25     |
| KTR9_1189 | Choline-glycine betaine transporter                                          | 2.73  | 0.22     |
| KTR9_1190 | FAD dependent oxidoreductase                                                 | 4.47  | 0.29     |
| KTR9_1191 | formyltetrahydrofolate deformylase                                           | 11.19 | 0.36     |
| KTR9_1192 | Sarcosine oxidase, gamma subunit                                             | 8.14  | 0.46     |
| KTR9_1193 | sarcosine oxidase, alpha subunit                                             | 2.71  | 0.49     |
| KTR9_1196 | Flavodoxin reductases (ferredoxin-NADPH reductases) family 1                 | 4.58  | 0.5      |
| KTR9_1218 | Proline dehydrogenase                                                        | 2.79  | 0        |
| KTR9_1219 | NAD-dependent aldehyde dehydrogenases                                        | 4.2   | 0        |
| KTR9_1257 | Methylase of polypeptide chain release factors                               | 2.54  | 0.37     |
| KTR9_1260 | ABC-type sugar transport system, ATPase component                            | 2.22  | 0.39     |
| KTR9_1262 | Ferredoxin subunits of nitrite reductase and ring-hydroxylating dioxygenases | 2.83  | 0.27     |
| KTR9_1265 | ring hydroxylating dioxygenase, alpha subunit                                | 2.07  | 0.06     |
| KTR9_1266 | ring hydroxylating dioxygenase, beta subunit                                 | 2.72  | 0.05     |
| KTR9_1343 | hypothetical protein                                                         | 2.37  | 0.48     |
| KTR9_1359 | hypothetical protein                                                         | 2.88  | 0.46     |
| KTR9_1360 | hypothetical protein                                                         | 4.07  | 0.46     |

|           |                                                                                         |       |          |
|-----------|-----------------------------------------------------------------------------------------|-------|----------|
| KTR9_1361 | hypothetical protein                                                                    | 3.81  | 0.25     |
| KTR9_1366 | hypothetical protein                                                                    | 2.64  | 0.39     |
| KTR9_1377 | hypothetical protein                                                                    | 10.17 | 0.39     |
| KTR9_1465 | hypothetical protein                                                                    | 2.09  | 0.41     |
| KTR9_1470 | Predicted membrane protein                                                              | 2.23  | 7.81E-05 |
| KTR9_1473 | phosphinothricin N-acetyltransferase                                                    | 3.05  | 0.36     |
| KTR9_1497 | Flavodoxin reductases (ferredoxin-NADPH reductases) family 1                            | 2.04  | 6.20E-04 |
| KTR9_1532 | hypothetical protein                                                                    | 7.29  | 0.09     |
| KTR9_1544 | Acyl dehydratase                                                                        | 3.39  | 0.08     |
| KTR9_1566 | Transposase and inactivated derivatives                                                 | 3.05  | 0.36     |
| KTR9_1567 | Transposase and inactivated derivatives                                                 | 2.75  | 0.37     |
| KTR9_1612 | Transcriptional regulators                                                              | 3.52  | 0.18     |
| KTR9_1622 | Panθοthenate kinase                                                                     | 2.15  | 6.85E-12 |
| KTR9_1661 | transcription factor WhiB                                                               | 2.43  | 2.44E-15 |
| KTR9_1698 | bacterioferritin-associated ferredoxin                                                  | 2.89  | 8.37E-03 |
| KTR9_1726 | hypothetical protein                                                                    | 2.14  | 0.38     |
| KTR9_1730 | Formamidopyrimidine-DNA glycosylase                                                     | 2.72  | 0.02     |
| KTR9_1747 | hypothetical protein                                                                    | 2.26  | 1.72E-03 |
| KTR9_1756 | Acyl-CoA dehydrogenases                                                                 | 4.83  | 7.08E-05 |
| KTR9_1757 | hypothetical protein                                                                    | 7.82  | 2.15E-04 |
| KTR9_1758 | large subunit of ring-hydroxylating dioxygenase                                         | 5.15  | 3.16E-05 |
| KTR9_1759 | hypothetical protein                                                                    | 4.95  | 5.21E-04 |
| KTR9_1760 | short-chain dehydorgenase/reductase                                                     | 3.94  | 9.15E-03 |
| KTR9_1761 | Flavodoxin reductases (ferredoxin-NADPH reductases) family 1                            | 4.92  | 0.03     |
| KTR9_1765 | Permease, MFS superfamily                                                               | 3.98  | 3.84E-03 |
| KTR9_1766 | FMN-binding protein                                                                     | 4.91  | 3.08E-03 |
| KTR9_1767 | hypothetical protein                                                                    | 4.46  | 0.03     |
| KTR9_2066 | fatty acid desaturase type 2                                                            | 3.23  | 3.65E-11 |
| KTR9_2153 | hypothetical protein                                                                    | 2.46  | 1.55E-09 |
| KTR9_2169 | hypothetical protein                                                                    | 2.25  | 1.15E-08 |
| KTR9_2273 | putative diaminohydroxyphosphoribosylaminopyrimidine deaminase, riboflavin biosynthesis | 2.34  | 0.27     |
| KTR9_2371 | hypothetical protein                                                                    | 5.38  | 0.15     |

|           |                                                                             |       |          |
|-----------|-----------------------------------------------------------------------------|-------|----------|
| KTR9_2429 | hypothetical protein                                                        | 2.23  | 0.02     |
| KTR9_2454 | DNA G:T-mismatch repair endonuclease                                        | 3.05  | 0.43     |
| KTR9_2586 | hypothetical protein                                                        | 3.39  | 0.38     |
| KTR9_2600 | Fe <sup>2+</sup> /Zn <sup>2+</sup> uptake regulation proteins               | 3.85  | 0.01     |
| KTR9_2614 | helix-turn-helix, AraC domain containing protein                            | 2.68  | 0.11     |
| KTR9_2615 | bifunctional deaminase-reductase domain-containing protein                  | 2.08  | 0.21     |
| KTR9_2655 | hypothetical protein                                                        | 2.21  | 8.04E-04 |
| KTR9_2686 | Histone acetyltransferase HPA2 and related acetyltransferases               | 2.45  | 0.31     |
| KTR9_2712 | Arginine repressor                                                          | 2.43  | 0.18     |
| KTR9_2713 | Ornithine carbamoyltransferase                                              | 2.57  | 2.65E-03 |
| KTR9_2714 | acetyloronithine aminotransferase                                           | 3.23  | 6.26E-03 |
| KTR9_2715 | Acetylglutamate kinase                                                      | 3.35  | 1.29E-03 |
| KTR9_2716 | bifunctional ornithine acetyltransferase / N-acetylglutamate synthase       | 3.35  | 4.04E-04 |
| KTR9_2717 | N-acetyl-gamma-glutamyl-phosphate reductase                                 | 3.57  | 3.58E-03 |
| KTR9_2724 | Ribosomal protein L35                                                       | 3.81  | 0.11     |
| KTR9_2738 | hypothetical membrane protein                                               | 2.31  | 0.29     |
| KTR9_2744 | hypothetical protein                                                        | 4.41  | 0.26     |
| KTR9_2752 | Glycosyltransferase                                                         | 2.25  | 0.18     |
| KTR9_2753 | hypothetical protein                                                        | 2.26  | 0.21     |
| KTR9_2819 | Ferredoxin                                                                  | 3.89  | 0.09     |
| KTR9_2825 | ABC-type branched-chain amino acid transport systems, periplasmic component | 2.6   | 0.43     |
| KTR9_2826 | hypothetical protein                                                        | 10.68 | 0.21     |
| KTR9_2828 | Permeases, MFS superfamily                                                  | 7.12  | 0.34     |
| KTR9_2855 | Enoyl-CoA hydratase \\ carnithine racemase                                  | 2.81  | 0.18     |
| KTR9_2878 | hypothetical protein                                                        | 2.03  | 0.32     |
| KTR9_2882 | Predicted transcriptional regulators                                        | 2.15  | 0.29     |
| KTR9_2926 | hypothetical protein                                                        | 2.14  | 0.04     |
| KTR9_3086 | Protein-tyrosine phosphatase                                                | 2.19  | 0.05     |
| KTR9_3132 | Predicted transcriptional regulators                                        | 2.11  | 0.03     |
| KTR9_3133 | hypothetical proteins                                                       | 4.94  | 0.18     |
| KTR9_3134 | hypothetical protein                                                        | 2.43  | 0.2      |

|           |                                                                                                                         |       |          |
|-----------|-------------------------------------------------------------------------------------------------------------------------|-------|----------|
| KTR9_3147 | hypothetical protein                                                                                                    | 2.43  | 0.14     |
| KTR9_3172 | Transcriptional regulators                                                                                              | 2.87  | 0.03     |
| KTR9_3178 | Transcriptional regulators                                                                                              | 2.06  | 2.89E-10 |
| KTR9_3179 | H <sup>+</sup> /gluconate symporter and related permeases                                                               | 2.57  | 4.54E-11 |
| KTR9_3182 | Alpha/beta hydrolase fold-3 domain protein                                                                              | 3.47  | 9.19E-04 |
| KTR9_3183 | Flavin reductase domain protein / FMN-binding protein                                                                   | 3.99  | 1.72E-04 |
| KTR9_3184 | Esterase / lipase                                                                                                       | 3.78  | 4.59E-05 |
| KTR9_3185 | Acyl-CoA dehydrogenases                                                                                                 | 4.3   | 3.06E-05 |
| KTR9_3186 | Acyl-CoA dehydrogenases                                                                                                 | 3.68  | 0.01     |
| KTR9_3187 | Coenzyme F420-dependent N5,N10-methylene tetrahydromethanopterin reductase and related flavin-dependent oxidoreductases | 4.03  | 0.03     |
| KTR9_3188 | Predicted flavoprotein involved in K <sup>+</sup> transport                                                             | 4.62  | 0.01     |
| KTR9_3189 | Acyl-CoA synthetases (AMP-forming)/AMP-acid ligases II                                                                  | 5.57  | 0.01     |
| KTR9_3190 | Predicted aminoglycoside phosphotransferase                                                                             | 5.19  | 0.09     |
| KTR9_3191 | Acyl-CoA synthetases (AMP-forming)/AMP-acid ligases II                                                                  | 6.89  | 0.05     |
| KTR9_3192 | hypothetical protein                                                                                                    | 6.39  | 0.1      |
| KTR9_3193 | Enoyl-CoA hydratase / carnithine racemase                                                                               | 4.7   | 0.17     |
| KTR9_3194 | short-chain dehydrogenase/reductase                                                                                     | 6.27  | 0.13     |
| KTR9_3195 | Acetyl-CoA acetyltransferase                                                                                            | 4.75  | 0.14     |
| KTR9_3196 | hypothetical protein                                                                                                    | 7.63  | 0.15     |
| KTR9_3197 | Acyl dehydratase                                                                                                        | 6.87  | 0.19     |
| KTR9_3240 | Ribosomal protein L28                                                                                                   | 23.73 | 0.01     |
| KTR9_3290 | hypothetical protein                                                                                                    | 3.07  | 0.02     |
| KTR9_3406 | Coenzyme F420-dependent N5,N10-methylene tetrahydromethanopterin reductase and related flavin-dependent oxidoreductases | 2.03  | 0.26     |
| KTR9_3428 | Cytosine deaminase / adenosine deaminase                                                                                | 2.19  | 0.1      |
| KTR9_3457 | conserved hypothetical protein, DUF1707 superfamily                                                                     | 2.61  | 2.44E-03 |
| KTR9_3467 | hypothetical protein                                                                                                    | 2.48  | 6.99E-03 |
| KTR9_3468 | MoxR-like ATPases                                                                                                       | 2.8   | 0.03     |
| KTR9_3469 | hypothetical protein                                                                                                    | 2.93  | 0.05     |
| KTR9_3503 | hypothetical protein                                                                                                    | 2.21  | 0.25     |
| KTR9_3552 | Biotin carboxyl carrier protein                                                                                         | 5.2   | 0.11     |
| KTR9_3573 | FAD/FMN-containing dehydrogenases                                                                                       | 4.53  | 0.12     |

|           |                                                                             |      |          |
|-----------|-----------------------------------------------------------------------------|------|----------|
| KTR9_3574 | DNA-binding HTH domain-containing proteins                                  | 2.02 | 0.02     |
| KTR9_3596 | hypothetical protein                                                        | 2.34 | 6.47E-03 |
| KTR9_3683 | ABC-type multidrug transport system, permease component                     | 2.03 | 0.41     |
| KTR9_3689 | response regulator receiver                                                 | 2.03 | 0.25     |
| KTR9_3728 | regulatory protein MerR                                                     | 2.19 | 0.02     |
| KTR9_3738 | hypothetical protein                                                        | 2.89 | 2.27E-04 |
| KTR9_3739 | Transcriptional regulator                                                   | 2.97 | 0.28     |
| KTR9_3764 | NAD-dependent aldehyde dehydrogenases                                       | 2.54 | 0.46     |
| KTR9_3765 | Zn-dependent alcohol dehydrogenases, class III                              | 2.22 | 0.48     |
| KTR9_3801 | hypothetical protein                                                        | 2.42 | 0.02     |
| KTR9_3871 | conserved hypothetical protein, nitrobinding superfamily                    | 2.06 | 4.92E-06 |
| KTR9_3873 | Cation transport ATPase                                                     | 2.12 | 8.08E-09 |
| KTR9_3885 | Ferredoxin                                                                  | 2.62 | 0.48     |
| KTR9_3889 | hypothetical protein                                                        | 8.14 | 0.29     |
| KTR9_3930 | TetR family transcriptional regulator                                       | 2.29 | 0.24     |
| KTR9_4044 | hypothetical protein                                                        | 2.62 | 2.72E-03 |
| KTR9_4069 | ADP-ribosylglycohydrolase                                                   | 2.07 | 0.01     |
| KTR9_4073 | hypothetical protein                                                        | 2.54 | 0.27     |
| KTR9_4096 | Transcriptional regulator                                                   | 2.88 | 0.46     |
| KTR9_4122 | Glycosyltransferase                                                         | 2.08 | 0.36     |
| KTR9_4177 | hypothetical protein                                                        | 3.46 | 0.41     |
| KTR9_4270 | Esterase/lipase                                                             | 2.05 | 5.70E-05 |
| KTR9_4276 | Transcriptional regulator                                                   | 2.36 | 9.96E-03 |
| KTR9_4286 | hypothetical protein                                                        | 2.67 | 0.18     |
| KTR9_4302 | Universal stress protein UspA and related nucleotide-binding proteins       | 2.36 | 0.17     |
| KTR9_4341 | putative cyclohexanol dehydrogenase                                         | 2.29 | 1.60E-07 |
| KTR9_4342 | hypothetical protein                                                        | 2.03 | 0.5      |
| KTR9_4358 | short-chain dehydrogenase/reductase                                         | 3.81 | 0.42     |
| KTR9_4361 | Gluconolactonase                                                            | 2.22 | 0.48     |
| KTR9_4370 | conserved hypothetical protein, Cupin_2 superfamily                         | 2.27 | 0.05     |
| KTR9_4422 | ABC-type Fe <sup>3+</sup> transport system, periplasmic component           | 2.1  | 0.44     |
| KTR9_4450 | DNA-directed RNA polymerase specialized sigma subunit, sigma24-like protein | 2.32 | 4.66E-15 |
| KTR9_4499 | hypothetical protein                                                        | 2.4  | 0.43     |



|           |                                                       |      |          |
|-----------|-------------------------------------------------------|------|----------|
| KTR9_4530 | conserver hypothetical protein, FMN_red superfamily   | 2.49 | 0.45     |
| KTR9_4548 | Trans-aconitate methyltransferase                     | 2.48 | 9.93E-06 |
| KTR9_4570 | Transcriptional regulator                             | 2.17 | 0.09     |
| KTR9_4574 | Transcriptional regulator                             | 2.02 | 0.09     |
| KTR9_4611 | putative HTH-type transcriptional regulator           | 2.01 | 0.27     |
| KTR9_4697 | hypothetical protein                                  | 3.25 | 0.44     |
| KTR9_4748 | hypothetical protein                                  | 2.2  | 0.46     |
| KTR9_4808 | hypothetical protein                                  | 3.05 | 0.11     |
| KTR9_4811 | hypothetical protein                                  | 2.44 | 0.34     |
| KTR9_4820 | hypothetical protein                                  | 2.24 | 0.49     |
| KTR9_4822 | hypothetical protein                                  | 2.69 | 0.25     |
| KTR9_4833 | hypothetical protein                                  | 5.09 | 0.46     |
| KTR9_4869 | hypothetical protein                                  | 3.05 | 0.47     |
| KTR9_4880 | integrase family protein                              | 2.24 | 0.49     |
| KTR9_4891 | hypothetical protein                                  | 2.27 | 0.42     |
| KTR9_4898 | hypothetical protein                                  | 5.09 | 0.46     |
| KTR9_4900 | ATPases with chaperone activity, ATP-binding subunit' | 3.05 | 0.31     |
| KTR9_4908 | hypothetical protein                                  | 2.94 | 0.18     |
| KTR9_4911 | hypothetical protein                                  | 2.06 | 0.26     |
| KTR9_4913 | hypothetical protein                                  | 2.62 | 9.42E-03 |
| KTR9_4940 | hypothetical protein                                  | 2.22 | 0.31     |
| KTR9_4975 | hypothetical protein                                  | 2.08 | 4.39E-07 |
| KTR9_4982 | hypothetical protein                                  | 2.03 | 0.44     |
| KTR9_4984 | hypothetical protein                                  | 2.13 | 0.26     |
| KTR9_5014 | non-hemolytic enterotoxin B                           | 2.58 | 0.31     |
| KTR9_5023 | transposase IS3/IS911 family protein                  | 2.59 | 3.95E-03 |
| KTR9_5027 | hypothetical protein                                  | 2.03 | 0.1      |
| KTR9_5028 | hypothetical protein                                  | 2.32 | 0.2      |
| KTR9_5031 | hypothetical protein                                  | 2.12 | 0.24     |
| KTR9_5033 | hypothetical protein                                  | 2.65 | 0.07     |
| KTR9_5034 | hypothetical protein                                  | 2.39 | 0.08     |
| KTR9_5035 | hypothetical membrane protein                         | 3.17 | 0.02     |
| KTR9_5036 | hypothetical protein                                  | 2.21 | 0.02     |
| KTR9_5037 | hypothetical protein                                  | 3.56 | 0.13     |

|                       |                                                                                             |       |          |
|-----------------------|---------------------------------------------------------------------------------------------|-------|----------|
| KTR9_5103             | hypothetical protein                                                                        | 2.48  | 0.04     |
| KTR9_5108             | hypothetical protein                                                                        | 2.09  | 0.42     |
| KTR9_5134             | hypothetical protein                                                                        | 3.62  | 2.28E-05 |
| KTR9_5154             | hypothetical protein                                                                        | 2.29  | 0.27     |
| KTR9_5164             | hypothetical protein                                                                        | 2.28  | 0.07     |
| KTR9_5170             | hypothetical protein                                                                        | 7.63  | 0.31     |
| KTR9_5293             | hypothetical protein                                                                        | 3.08  | 0.05     |
| KTR9_5294             | hypothetical protein                                                                        | 3.45  | 0.05     |
| KTR9_5295             | hypothetical protein                                                                        | 2.09  | 0.41     |
| KTR9_5296             | hypothetical membrane protein                                                               | 2.03  | 0.5      |
| KTR9_5297             | hypothetical protein                                                                        | 2.93  | 0.07     |
| KTR9_5298             | hypothetical protein                                                                        | 2.89  | 0.09     |
| KTR9_5299             | hypothetical protein                                                                        | 2.08  | 0.38     |
| KTR9_5301             | hypothetical protein                                                                        | 3.36  | 0.26     |
| KTR9_5319             | hypothetical protein                                                                        | 3.17  | 8.36E-03 |
| KTR9_5352             | helix-turn-helix domain-containing protein                                                  | 4.58  | 0.34     |
| KTR9_5356             | hypothetical protein                                                                        | 2.08  | 0.08     |
| KTR9_5370             | hypothetical protein                                                                        | 2.71  | 0.49     |
| KTR9_5374             | Transposase and inactivated derivatives                                                     | 2.54  | 0.37     |
| KTR9_5378             | AraC-type DNA-binding domain-containing proteins                                            | 2.78  | 0.02     |
| KTR9_5381             | Uncharacterized NAD(FAD)-dependent dehydrogenases                                           | 2.08  | 0.38     |
| KTR9_5382             | Transglutaminase-like protein, putative cysteine protease                                   | 2.29  | 0.44     |
| KTR9_5411             | ABC-type transport system involved in resistance to organic solvents, periplasmic component | 2.12  | 0.49     |
| KTR9_5417             | Transposase and inactivated derivatives                                                     | 2.2   | 0.25     |
| KTR9_5419             | helicase-associated protein                                                                 | 2.5   | 0.4      |
| KTR9_5427             | hypothetical protein                                                                        | 2.11  | 0.46     |
| KTR9_5429             | hypothetical protein                                                                        | 15.26 | 0.26     |
| KTR9_5436             | membrane protein                                                                            | 15.26 | 0.26     |
| KTR9_5438             | hypothetical protein                                                                        | 2.19  | 0.45     |
| KTR9_5445             | hypothetical protein                                                                        | 2.32  | 0.33     |
| KTR9_5450             | hypothetical protein                                                                        | 2.11  | 4.56E-04 |
| KTR9_5452             | hypothetical protein                                                                        | 2.37  | 0.48     |
| <hr/>                 |                                                                                             |       |          |
| <b>Down-regulated</b> |                                                                                             |       |          |
| <hr/>                 |                                                                                             |       |          |
| KTR9_0023             | Permease, MFS superfamily                                                                   | -2.23 | 0.15     |

|           |                                                                                                  |       |          |
|-----------|--------------------------------------------------------------------------------------------------|-------|----------|
| KTR9_0068 | putative molybdopterin oxidoreductase                                                            | -2.77 | 7.98E-03 |
| KTR9_0076 | Zn-dependent alcohol dehydrogenases, class III                                                   | -2.34 | 9.45E-04 |
| KTR9_0077 | beta-lactamase domain protein                                                                    | -2.06 | 9.46E-03 |
| KTR9_0084 | ATP-dependent DNA ligase                                                                         | -2.46 | 0.09     |
| KTR9_0095 | NAD-dependent aldehyde dehydrogenases                                                            | -2.52 | 0.01     |
| KTR9_0100 | Hypothetical protein                                                                             | -2.25 | 1.71E-05 |
| KTR9_0130 | Hypothetical protein                                                                             | -2.95 | 0.3      |
| KTR9_0142 | Hypothetical protein                                                                             | -2.27 | 0.12     |
| KTR9_0169 | Hypothetical protein                                                                             | -2.13 | 0.48     |
| KTR9_0194 | Putative <i>N</i> -acetylmuramoyl-L-alanine amidase                                              | -2.32 | 7.20E-09 |
| KTR9_0207 | Predicted esterase                                                                               | -2.02 | 1.96E-11 |
| KTR9_0208 | Hypothetical protein                                                                             | -2.79 | 9.03E-06 |
| KTR9_0209 | Hypothetical protein                                                                             | -3.75 | 3.52E-04 |
| KTR9_0225 | Cell wall arabinan synthesis protein                                                             | -2.51 | 0.16     |
| KTR9_0226 | Cell wall arabinan synthesis protein                                                             | -2.48 | 0.23     |
| KTR9_0279 | Transcriptional regulators                                                                       | -2.5  | 0.2      |
| KTR9_0317 | Predicted redox protein, regulator of disulfide bond formation                                   | -2.04 | 0.48     |
| KTR9_0371 | Permeases of the drug/metabolite transporter, DMT superfamily                                    | -2.25 | 1.31E-03 |
| KTR9_0382 | Nitroreductase                                                                                   | -2.4  | 0.31     |
| KTR9_0383 | Permease, MFS superfamily                                                                        | -4.47 | 4.62E-06 |
| KTR9_0384 | Transcriptional regulator                                                                        | -2.59 | 0.25     |
| KTR9_0390 | Gluconate kinase                                                                                 | -2.3  | 0.16     |
| KTR9_0391 | H <sup>+</sup> /gluconate symporter and related permeases                                        | -3.02 | 0.04     |
| KTR9_0394 | Ferritin Dps family protein                                                                      | -2.47 | 3.33E-15 |
| KTR9_0468 | UDP-glucose 4-epimerase                                                                          | -2.11 | 0.05     |
| KTR9_0493 | Acyl carrier protein                                                                             | -2.95 | 0.49     |
| KTR9_0604 | Chaperonin GroEL (HSP60 family)                                                                  | -4.15 | 1.91E-14 |
| KTR9_0605 | Lactoylglutathione lyase and related lyases                                                      | -3.93 | 0.27     |
| KTR9_0608 | Predicted acetyltransferase                                                                      | -2.5  | 0.23     |
| KTR9_0668 | Hypothetical protein                                                                             | -2.02 | 0.02     |
| KTR9_0734 | Conserved hypothetical protein, glyoxalase superfamily                                           | -2.14 | 0.06     |
| KTR9_0852 | Cytochrome bd-type quinol oxidase, subunit 1                                                     | -2.69 | 1.08E-05 |
| KTR9_0853 | Cytochrome bd-type quinol oxidase, subunit 2                                                     | -3.09 | 4.35E-05 |
| KTR9_0854 | ABC-type transport system involved in cytochrome bd biosynthesis, ATPase and permease components | -2.78 | 8.55E-03 |

|           |                                                                                                                         |       |          |
|-----------|-------------------------------------------------------------------------------------------------------------------------|-------|----------|
| KTR9_0855 | ABC-type multidrug transport system, ATPase and permease components                                                     | -2.44 | 0.02     |
| KTR9_0997 | Ribosomal protein L10                                                                                                   | -2.17 | 3.70E-04 |
| KTR9_0998 | Ribosomal protein L7/L12                                                                                                | -3.32 | 6.83E-04 |
| KTR9_1009 | Hypothetical protein                                                                                                    | -2.7  | 0.1      |
| KTR9_1047 | Hypothetical protein                                                                                                    | -2.34 | 0.26     |
| KTR9_1093 | 4-hydroxyacetophenone monooxygenase                                                                                     | -2.02 | 0.41     |
| KTR9_1130 | Transglycosylase domain-containing protein                                                                              | -2.15 | 0        |
| KTR9_1153 | ABC-type phosphate/phosphonate transport system, ATPase component                                                       | -3.11 | 0.42     |
| KTR9_1205 | Cytosine/adenosine deaminases                                                                                           | -3.2  | 0.34     |
| KTR9_1329 | Acetyltransferase                                                                                                       | -2.08 | 0.2      |
| KTR9_1427 | Transglycosylase domain-containing protein                                                                              | -2.22 | 0.12     |
| KTR9_1428 | Dimethyladenosine transferase (rRNA methylation)                                                                        | -2.53 | 0.33     |
| KTR9_1502 | Stress protein                                                                                                          | -2.64 | 0.07     |
| KTR9_1503 | Hypothetical protein                                                                                                    | -2.12 | 2.60E-04 |
| KTR9_1504 | Predicted multitransmembrane protein                                                                                    | -2.15 | 0.06     |
| KTR9_1505 | ABC-type metal ion transport system, periplasmic component / surface antigen                                            | -3.93 | 0.47     |
| KTR9_1508 | Coenzyme F420-dependent N5,N10-methylene tetrahydromethanopterin reductase and related flavin-dependent oxidoreductases | -2.89 | 0.22     |
| KTR9_1515 | Predicted esterase                                                                                                      | -2.55 | 3.33E-08 |
| KTR9_1632 | Fumarase                                                                                                                | -2.17 | 2.29E-04 |
| KTR9_1633 | Tartrate dehydratase alpha subunit/Fumarate hydratase class I, N-terminal domain                                        | -2.57 | 0.04     |
| KTR9_1659 | Co-chaperonin GroES (HSP10)                                                                                             | -2.81 | 2.57E-08 |
| KTR9_1660 | Chaperonin GroEL (HSP60 family)                                                                                         | -2.04 | 2.38E-04 |
| KTR9_1794 | DNA-directed RNA polymerase specialized sigma subunit, sigma24 -like protein                                            | -3.78 | 2.22E-15 |
| KTR9_1839 | Membrane protein                                                                                                        | -5.64 | 6.23E-03 |
| KTR9_1840 | Hypothetical protein                                                                                                    | -2.01 | 0.14     |
| KTR9_1845 | Hypothetical protein                                                                                                    | -2.78 | 6.80E-03 |
| KTR9_1855 | Protein chain release factor A                                                                                          | -2.01 | 0.08     |
| KTR9_1861 | F0F1-type ATP synthase, subunit a                                                                                       | -2.99 | 1.72E-10 |
| KTR9_1863 | F0F1-type ATP synthase, subunit b                                                                                       | -2.16 | 2.02E-12 |
| KTR9_1864 | F0F1-type ATP synthase, delta subunit (mitochondrial oligomycin sensitivity protein)                                    | -2.11 | 2.85E-11 |

|           |                                                                             |       |          |
|-----------|-----------------------------------------------------------------------------|-------|----------|
| KTR9_1865 | F0F1-type ATP synthase, alpha subunit                                       | -2.14 | 3.30E-12 |
| KTR9_1886 | Inner membrane protein                                                      | -2.16 | 4.40E-04 |
| KTR9_1932 | Na <sup>+</sup> /H <sup>+</sup> -dicarboxylate symporters                   | -2.03 | 4.30E-05 |
| KTR9_1957 | Putative thioesterase                                                       | -2.02 | 0.41     |
| KTR9_1969 | DsbA oxidoreductase                                                         | -2.1  | 0.01     |
| KTR9_1972 | Formamidopyrimidine-DNA glycosylase                                         | -2.31 | 0.27     |
| KTR9_1974 | Hypothetical protein                                                        | -5.02 | 1.20E-03 |
| KTR9_1994 | L-ectoine synthase                                                          | -2.46 | 1.72E-06 |
| KTR9_1995 | L-2,4-diaminobutyric aminotransferase                                       | -2.86 | 6.21E-12 |
| KTR9_2090 | Hypothetical protein                                                        | -4.67 | 3.00E-15 |
| KTR9_2221 | Preprotein translocase subunit SecD                                         | -2.04 | 7.73E-03 |
| KTR9_2226 | Peptidyl-prolyl cis-trans isomerase (rotamase) - cyclophilin family         | -2.15 | 0.03     |
| KTR9_2392 | Hypothetical protein                                                        | -2.09 | 0.04     |
| KTR9_2393 | Predicted metal-dependent hydrolase with the TIM-barrel fold                | -2.16 | 0.19     |
| KTR9_2434 | Hypothetical protein                                                        | -2.29 | 0.43     |
| KTR9_2475 | Peptidase_M23 superfamily protein                                           | -6.88 | 0.1      |
| KTR9_2531 | Predicted GTPases                                                           | -2.08 | 0.13     |
| KTR9_2535 | Hypothetical protein                                                        | -2.11 | 0.24     |
| KTR9_2545 | Hypothetical protein                                                        | -2.33 | 0.21     |
| KTR9_2549 | DNA-directed RNA polymerase specialized sigma subunit, sigma24-like protein | -2.03 | 0.45     |
| KTR9_2551 | Short-chain dehydrogenase/reductase                                         | -3.34 | 0.43     |
| KTR9_2562 | Ribulose 1,5-bisphosphate carboxylase, large subunit                        | -3.77 | 0.33     |
| KTR9_2587 | Zn-dependent hydrolases, including glyoxylases                              | -3.79 | 0.29     |
| KTR9_2590 | Hypothetical protein                                                        | -3.07 | 0.36     |
| KTR9_2596 | Pyridoxamine 5'-phosphate oxidase family protein                            | -2.95 | 0.49     |
| KTR9_2682 | Chorismate mutase                                                           | -2.24 | 0.35     |
| KTR9_2721 | Transcriptional accessory protein                                           | -2.05 | 0.25     |
| KTR9_2779 | Hypothetical protein                                                        | -2.56 | 0.41     |
| KTR9_2784 | Acyl-CoA synthetases (AMP-forming)/AMP-acid ligases II                      | -2.09 | 0.11     |
| KTR9_2956 | Hypothetical protein                                                        | -2.37 | 0.17     |
| KTR9_2957 | Nicotinate-nucleotide pyrophosphorylase                                     | -2.62 | 4.56E-04 |
| KTR9_2958 | Quinolate synthase                                                          | -2.8  | 1.02E-13 |
| KTR9_2992 | Hypothetical protein                                                        | -2.14 | 2.80E-04 |
| KTR9_3039 | Cell wall-associated hydrolases (invasion- associated                       | -2.57 | 0.04     |

|           |                                                                                                                         |        |          |
|-----------|-------------------------------------------------------------------------------------------------------------------------|--------|----------|
|           | proteins)                                                                                                               |        |          |
| KTR9_3040 | Cell wall-associated hydrolases (invasion- associated proteins)                                                         | -2.06  | 6.18E-04 |
| KTR9_3071 | Glutamine synthetase, type I                                                                                            | -2.19  | 0        |
| KTR9_3119 | Beta-lactamase class C and other penicillin binding proteins                                                            | -2.08  | 0.16     |
| KTR9_3163 | Sulfite reductase                                                                                                       | -2.6   | 7.78E-07 |
| KTR9_3221 | Gamma-aminobutyrate permease and related permeases                                                                      | -2.35  | 0.32     |
| KTR9_3233 | Predicted drug exporters, RND superfamily                                                                               | -2.14  | 0.23     |
| KTR9_3234 | Hypothetical protein                                                                                                    | -2     | 0.35     |
| KTR9_3237 | DUF1994 domain-containing protein                                                                                       | -2.53  | 0.5      |
| KTR9_3254 | 3-isopropylmalate dehydratase large subunit                                                                             | -2.04  | 0.02     |
| KTR9_3262 | D-3-phosphoglycerate dehydrogenase                                                                                      | -2.02  | 0.02     |
| KTR9_3318 | Coenzyme F420-dependent N5,N10-methylene tetrahydromethanopterin reductase and related flavin-dependent oxidoreductases | -2.18  | 1.41E-03 |
| KTR9_3424 | Hypothetical protein                                                                                                    | -2.75  | 6.85E-11 |
| KTR9_3425 | Formate/nitrite family of transporters                                                                                  | -2.35  | 0        |
| KTR9_3434 | Trypsin-like serine proteases                                                                                           | -15.23 | 1.77E-14 |
| KTR9_3435 | Lactoylglutathione lyase and related lyases                                                                             | -2.94  | 3.63E-07 |
| KTR9_3436 | Peptide methionine sulfoxide reductase                                                                                  | -4.92  | 2.62E-05 |
| KTR9_3437 | Predicted GTPase, probable translation factor                                                                           | -2.2   | 0.05     |
| KTR9_3493 | Cell division protein                                                                                                   | -2.92  | 0.02     |
| KTR9_3494 | Predicted ATPase involved in cell division                                                                              | -2.03  | 0.1      |
| KTR9_3515 | Predicted flavoprotein involved in K <sup>+</sup> transport                                                             | -2.65  | 9.51E-05 |
| KTR9_3531 | Predicted methylated DNA-protein cysteine methyltransferase                                                             | -3.15  | 9.01E-10 |
| KTR9_3532 | Hypothetical protein                                                                                                    | -2.64  | 2.44E-15 |
| KTR9_3533 | Uroporphyrinogen-III synthase                                                                                           | -2.69  | 1.32E-14 |
| KTR9_3538 | Adenylyltransferase, thiamin (thiazole moiety) biosynthesis protein \\ molybdopterin synthase sulfurylase protein       | -2.09  | 1.78E-06 |
| KTR9_3553 | Anti-sigma factor                                                                                                       | -2.17  | 4.17E-05 |
| KTR9_3594 | Xanthine permeases / uracil permeases                                                                                   | -2.3   | 8.88E-16 |
| KTR9_3753 | Predicted esterase                                                                                                      | -2.58  | 0.13     |
| KTR9_3755 | CDP-diacylglycerol pyrophosphatase                                                                                      | -2.02  | 0.18     |
| KTR9_3803 | Hypothetical protein                                                                                                    | -2.25  | 0.14     |
| KTR9_3806 | Predicted flavoprotein involved in K <sup>+</sup> transport                                                             | -3.04  | 0.29     |
| KTR9_3807 | Regulatory protein TetR                                                                                                 | -2.32  | 0.45     |

|           |                                                                                                  |        |          |
|-----------|--------------------------------------------------------------------------------------------------|--------|----------|
| KTR9_3810 | ABC-type nitrate/sulfonate/bicarbonate transport systems, periplasmic components                 | -2.75  | 0.27     |
| KTR9_3811 | ABC-type nitrate/sulfonate/bicarbonate transport system, permease component                      | -3.11  | 0.25     |
| KTR9_3821 | Hypothetical protein                                                                             | -3.38  | 0.02     |
| KTR9_3952 | Hypothetical protein                                                                             | -2.95  | 0.3      |
| KTR9_3953 | Selenocysteine lyase                                                                             | -2.32  | 0.45     |
| KTR9_3975 | Hypothetical protein                                                                             | -2.15  | 0.24     |
| KTR9_3982 | Permeases, MFS superfamily                                                                       | -2.27  | 0.42     |
| KTR9_4005 | 4-aminobutyrate aminotransferase and related aminotransferases                                   | -25.25 | 0        |
| KTR9_4006 | FAD/FMN-dependent dehydrogenases                                                                 | -46.94 | 0        |
| KTR9_4007 | Succinate-semialdehyde dehydrogenase                                                             | -53.88 | 0        |
| KTR9_4008 | Xaa-Pro aminopeptidase                                                                           | -17.03 | 0        |
| KTR9_4009 | Transcriptional regulators                                                                       | -10.49 | 0        |
| KTR9_4010 | Putative acetylornithine deacetylase                                                             | -2.36  | 2.01E-06 |
| KTR9_4011 | Permeases, MFS superfamily                                                                       | -6.26  | 3.77E-15 |
| KTR9_4012 | Transcriptional regulators                                                                       | -4.16  | 3.44E-15 |
| KTR9_4013 | Hypothetical protein                                                                             | -35.75 | 1.81E-09 |
| KTR9_4014 | Asp-tRNA <sup>Asn</sup> /Glu-tRNA <sup>Gln</sup> amidotransferase A subunit and related amidases | -28.73 | 0        |
| KTR9_4015 | Maleate cis-trans isomerase                                                                      | -16.01 | 1.64E-05 |
| KTR9_4023 | PPOX class putative F420-dependent enzyme                                                        | -2.22  | 0.18     |
| KTR9_4024 | Maleate cis-trans isomerase                                                                      | -8.32  | 2.02E-04 |
| KTR9_4092 | Acyl CoA:acetate / 3-ketoacid CoA transferase, beta subunit                                      | -2.32  | 0.39     |
| KTR9_4093 | Acyl CoA:acetate / 3-ketoacid CoA transferase, alpha subunit                                     | -2.79  | 0.22     |
| KTR9_4095 | Acetyl-CoA acetyltransferase                                                                     | -2.95  | 0.3      |
| KTR9_4116 | ABC-type Fe <sup>3+</sup> -hydroxamate transport system, periplasmic component                   | -8.36  | 0.28     |
| KTR9_4138 | Hypothetical protein                                                                             | -3.39  | 0.02     |
| KTR9_4140 | Peptide methionine sulfoxide reductase A                                                         | -2.88  | 2.32E-09 |
| KTR9_4141 | Peptide methionine sulfoxide reductase B                                                         | -3.34  | 0        |
| KTR9_4172 | DnaJ-class molecular chaperone                                                                   | -2.37  | 1.28E-06 |
| KTR9_4173 | Molecular chaperone GrpE                                                                         | -2.87  | 1.60E-10 |
| KTR9_4174 | Molecular chaperone                                                                              | -2.9   | 9.99E-16 |
| KTR9_4181 | ATP-dependent Lon protease, bacterial type                                                       | -2.91  | 3.53E-06 |
| KTR9_4220 | Predicted dinucleotide-binding protein                                                           | -2.11  | 8.14E-03 |

|           |                                                                               |       |          |
|-----------|-------------------------------------------------------------------------------|-------|----------|
| KTR9_4265 | Cytosine permease                                                             | -2.15 | 0.03     |
| KTR9_4348 | Hypothetical protein                                                          | -3.2  | 0.5      |
| KTR9_4388 | ABC-type dipeptide/oligopeptide/nickel transport systems, permease components | -2.35 | 2.17E-05 |
| KTR9_4390 | ABC-type dipeptide transport system, periplasmic component                    | -2.3  | 8.03E-05 |
| KTR9_4401 | Short-chain dehydrogenase/reductase                                           | -5.41 | 0.44     |
| KTR9_4467 | Arsenite efflux pump, permeases                                               | -2.82 | 0.25     |
| KTR9_4469 | Protein-tyrosine phosphatase                                                  | -2.36 | 0.46     |
| KTR9_4483 | Short-chain dehydrogenase/reductase                                           | -3.4  | 0.08     |
| KTR9_4484 | Permease, MFS superfamily                                                     | -2.11 | 0.37     |
| KTR9_4507 | Hypothetical protein                                                          | -2.83 | 1.47E-05 |
| KTR9_4525 | Aspartate oxidase                                                             | -2.99 | 7.02E-04 |
| KTR9_4584 | 2,5-didehydrogluconate reductase                                              | -2.09 | 2.37E-03 |
| KTR9_4594 | Hypothetical protein                                                          | -9.24 | 2.98E-09 |
| KTR9_4712 | Hypothetical protein                                                          | -2.36 | 0.01     |
| KTR9_4713 | Putative stress protein                                                       | -2.58 | 0.08     |
| KTR9_4714 | Hypothetical protein                                                          | -2.49 | 0.05     |
| KTR9_4715 | Hypothetical protein                                                          | -2.65 | 0.1      |
| KTR9_4716 | Hypothetical protein                                                          | -3.31 | 0.1      |
| KTR9_4717 | Membrane protein                                                              | -4.52 | 0.07     |
| KTR9_4726 | Predicted Na <sup>+</sup> -dependent transporter                              | -2.28 | 0.19     |
| KTR9_5003 | Glutaredoxin-like proteins                                                    | -2.27 | 9.01E-07 |
| KTR9_5329 | Hypothetical protein                                                          | -3.25 | 0.08     |

---



Table S4. Potential sRNAs in *Gordonia* sp. KTR9.<sup>a</sup>

| Name | Position | Start   | End     | Length (bp) | Highest read number | Comment <sup>b</sup>                                                                                     |
|------|----------|---------|---------|-------------|---------------------|----------------------------------------------------------------------------------------------------------|
| 1A   | pGKT1    | 50302   | 50561   | 259         | 1637                |                                                                                                          |
| 1B   | pGKT1    | 86952   | 86673   | 279         | 5560                | predicted promoter: ccgaca...ggggaatt                                                                    |
| 2A   | pGKT2    | 4437    | 4700    | 263         | 4177                | predicted promoter: gtgcga...cctcaact                                                                    |
| 3A   | pGKT3    | 82763   | 82356   | 407         | 7043                | predicted promoter: ctgcat...tgttattca                                                                   |
| CA   | KTR9     | 135953  | 136287  | 334         | 7877                |                                                                                                          |
| CB   | KTR9     | 491121  | 491437  | 316         | 4264                |                                                                                                          |
| CC   | KTR9     | 500382  | 500795  | 413         | 31597               | overlaps KTR9_0435 (hypothetical protein)                                                                |
| CD   | KTR9     | 943964  | 944269  | 305         | 5141                | overlaps KTR9_0848 (cold shock protein)                                                                  |
| CE   | KTR9     | 1371813 | 1372100 | 287         | 8191                | overlaps KTR9_1211 (hypothetical protein)                                                                |
| CF   | KTR9     | 1503764 | 1504241 | 477         | 41873               |                                                                                                          |
| CG   | KTR9     | 1710855 | 1711354 | 499         | 31424               | overlaps KTR9_1510 (hypothetical protein)                                                                |
| CH   | KTR9     | 3561225 | 3560902 | 323         | 13714               |                                                                                                          |
| CI   | KTR9     | 3876611 | 3877016 | 405         | 8369                | predicted promoter:ttcaca...accctaaact                                                                   |
| CJ   | KTR9     | 3941913 | 3942409 | 496         | 9389                | overlaps KTR9_3451 (hypothetical protein);<br>predicted promoter: gtgtct...ctttctaat                     |
| CK   | KTR9     | 3980817 | 3980474 | 343         | 408170              | 74% nucleotide sequence identity with tmRNA of <i>Corynebacterium diphtheriae</i> NCTC 13129 (NC_002935) |

<sup>a</sup>sRNAs were identified as transcripts in RNA-seq studies (>1500 reads) that had no protein coding sequence in any of the 6 reading frames. The orientation of predicted sRNAs was based on a BLAST search of the sRNA database (<http://bioinfo.mikro.bio.med.uni-giessen.de/sRNAdb/Blast>), the minimum free energy prediction for the sRNA secondary structure (<http://rna.tbi.univie.ac.at/cgi-bin/RNAfold.cgi>) and the prediction of sRNA promoter location (<http://linux1.softberry.com/berry.phtml?topic=bprom&group=programs&subgroup=gfindb>).

<sup>b</sup>Overlaps with annotated ORFs are noted. The nucleotide sequences of the predicted promoters represent the -35 and -10 regions.

Table S5. Annotation of cholesterol catabolic genes of KTR9<sup>a</sup>.

| Gene name     | Locus tag | Annotation                                                                                       | Identity <sup>b</sup> (%) |
|---------------|-----------|--------------------------------------------------------------------------------------------------|---------------------------|
| <i>kstR</i>   | KTR9_0788 | Transcriptional regulator, TetR family                                                           | 68                        |
| <i>fadE34</i> | KTR9_0789 | Acyl-CoA dehydrogenase                                                                           | 47                        |
| <i>fadE28</i> | KTR9_0790 | Acyl-CoA dehydrogenase                                                                           | 48                        |
| <i>fadE29</i> | KTR9_0791 | Acyl-CoA dehydrogenase                                                                           | 73                        |
|               | KTR9_0792 | Conserved hypothetical protein                                                                   | 61                        |
|               | KTR9_0793 | Conserved hypothetical protein                                                                   | 73                        |
| <i>ltp2</i>   | KTR9_0794 | Branched-chain $\beta$ -ketoacyl-CoA thiolase                                                    | 77                        |
| <i>hsd4B</i>  | KTR9_0801 | 2-Enoyl acyl-CoA hydratase                                                                       | 59                        |
| <i>kstD</i>   | KTR9_0802 | 3-Ketosteroid- $\Delta^1$ -dehydrogenase                                                         | 64                        |
| <i>hsaE</i>   | KTR9_0810 | 2-Hydroxypenta-2,4-dienoate hydratase                                                            | 65                        |
| <i>hsaG</i>   | KTR9_0811 | Acetaldehyde dehydrogenase                                                                       | 78                        |
| <i>hsaF</i>   | KTR9_0812 | 4-Hydroxy-2-ketovalerate aldolase                                                                | 78                        |
|               | KTR9_0818 | Conserved hypothetical protein                                                                   | 40                        |
| <i>kshA</i>   | KTR9_0819 | 3-Ketosteroid-9 $\alpha$ -hydroxylase, oxygenase component                                       | 61                        |
| <i>hsaA</i>   | KTR9_0820 | 3-Hydroxy-9,10-seconandrosta-1,3,5(10)-trien-9,17-dione (3-HSA) hydroxylase, oxygenase component | 75                        |
| <i>hsaC</i>   | KTR9_0821 | 3,4-Dihydroxy-9,10-seconandrosta-1,3,5(10)-trien-9,17-dione (3,4-DHSA) dioxygenase               | 78                        |
| <i>hsaB</i>   | KTR9_0822 | 3-HSA hydroxylase, reductase component                                                           | 58                        |
| <i>fadE33</i> | KTR9_0827 | Acyl-CoA dehydrogenase                                                                           | 40                        |
| <i>fadE32</i> | KTR9_0828 | Acyl-CoA dehydrogenase                                                                           | 49                        |
| <i>fadE31</i> | KTR9_0829 | Acyl-CoA dehydrogenase                                                                           | 64                        |
| <i>choD</i>   | KTR9_1668 | Cholesterol oxidase                                                                              | 68                        |
| <i>kshB</i>   | KTR9_3740 | 3-Ketosteroid-9 $\alpha$ -hydroxylase, reductase component                                       | 55                        |
| <i>mce4F</i>  | KTR9_3876 | MCE family protein                                                                               | 42                        |
| <i>mce4E</i>  | KTR9_3877 | MCE family protein                                                                               | 30                        |
| <i>mce4D</i>  | KTR9_3878 | MCE family protein                                                                               | 40                        |
| <i>mce4C</i>  | KTR9_3879 | MCE family protein                                                                               | 40                        |
| <i>mce4B</i>  | KTR9_3880 | MCE family protein                                                                               | 45                        |
| <i>mce4A</i>  | KTR9_3881 | MCE family protein                                                                               | 39                        |
| <i>supB</i>   | KTR9_3882 | ABC transporter permease subunit                                                                 | 70                        |
| <i>supA</i>   | KTR9_3883 | ABC transporter permease subunit                                                                 | 69                        |

|                 |           |                                                                                          |    |
|-----------------|-----------|------------------------------------------------------------------------------------------|----|
| <i>hsd4A</i>    | KTR9_3884 | Hydroxysteroid dehydrogenase                                                             | 64 |
| <i>fdxD</i>     | KTR9_3885 | Ferredoxin                                                                               | 50 |
| <i>fadE26</i>   | KTR9_3886 | Acyl-CoA dehydrogenase                                                                   | 74 |
| <i>fadE27</i>   | KTR9_3887 | Acyl-CoA dehydrogenase                                                                   | 45 |
| <i>fadD17</i>   | KTR9_3888 | Acyl-CoA synthetase                                                                      | 56 |
| <i>fadD19</i>   | KTR9_3892 | Acyl-CoA synthetase                                                                      | 58 |
| <i>echA19</i>   | KTR9_3893 | Enoyl-CoA hydratase                                                                      | 76 |
|                 | KTR9_3895 | Flavin Coenzyme F420 dependent oxidoreductase                                            | 69 |
|                 | KTR9_3896 | Conserved hypothetical protein                                                           | 59 |
| <i>ltp4</i>     | KTR9_3897 | $\beta$ -Ketoacyl-CoA thiolase                                                           | 58 |
| <i>ltp3</i>     | KTR9_3898 | SCPx-related $\beta$ -ketoacyl-CoA thiolase                                              | 79 |
| <i>cyp125A1</i> | KTR9_3902 | Cytochrome P450                                                                          | 61 |
| <i>fadA5</i>    | KTR9_3903 | $\beta$ -Ketoacyl-CoA thiolase                                                           | 72 |
|                 | KTR9_3904 | Conserved hypothetical protein                                                           | 51 |
|                 | KTR9_3911 | Short chain dehydrogenase/reductase SDR                                                  | 63 |
|                 | KTR9_3912 | Short chain dehydrogenase/reductase SDR                                                  | 59 |
| <i>echA20</i>   | KTR9_3913 | Enoyl-CoA hydratase                                                                      | 75 |
| <i>ipdA</i>     | KTR9_3914 | CoA transferase, alpha subunit                                                           | 68 |
| <i>ipdB</i>     | KTR9_3915 | CoA transferase, beta subunit                                                            | 67 |
|                 | KTR9_3916 | Oxidoreductase                                                                           | 71 |
| <i>kstR2</i>    | KTR9_3920 | Transcriptional regulator, TetR family                                                   | 63 |
| <i>fadA6</i>    | KTR9_3922 | $\beta$ -Ketoacyl-CoA thiolase                                                           | 71 |
|                 | KTR9_3923 | Oxidoreductase                                                                           | 72 |
| <i>fadE30</i>   | KTR9_3924 | Acyl-CoA dehydrogenase                                                                   | 66 |
| <i>fadD3</i>    | KTR9_3925 | Acyl-CoA synthetase                                                                      | 59 |
| <i>hsaD</i>     | KTR9_4392 | 4,5-9,10-Diseco-3-hydroxy-5,9,17-trioxoandrosta-1(10),2-dien-4-oate (4,9-DSHA) hydrolase | 35 |

<sup>a</sup> Annotation is based on assignments described in (21, S1 and S2).

<sup>b</sup> Amino acid identity with the *Mtb* H37Rv orthologue

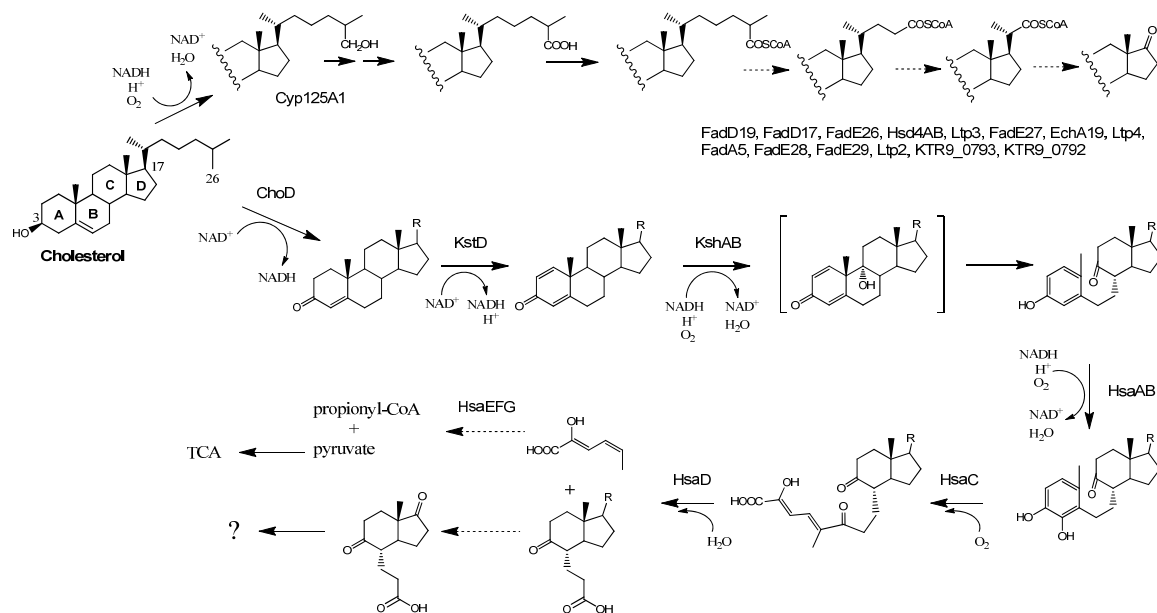

Figure S1. Cholesterol catabolic pathway in KTR9 based on metabolic reconstruction. Dashed arrows represent multiple steps. ChoD is tentatively assigned to the initial transformation of ring A. R can either be a partially degraded side chain containing 3, 5, or 8 carbons, and a CoA moiety, or a keto group. TCA, tricarboxylic acid cycle.

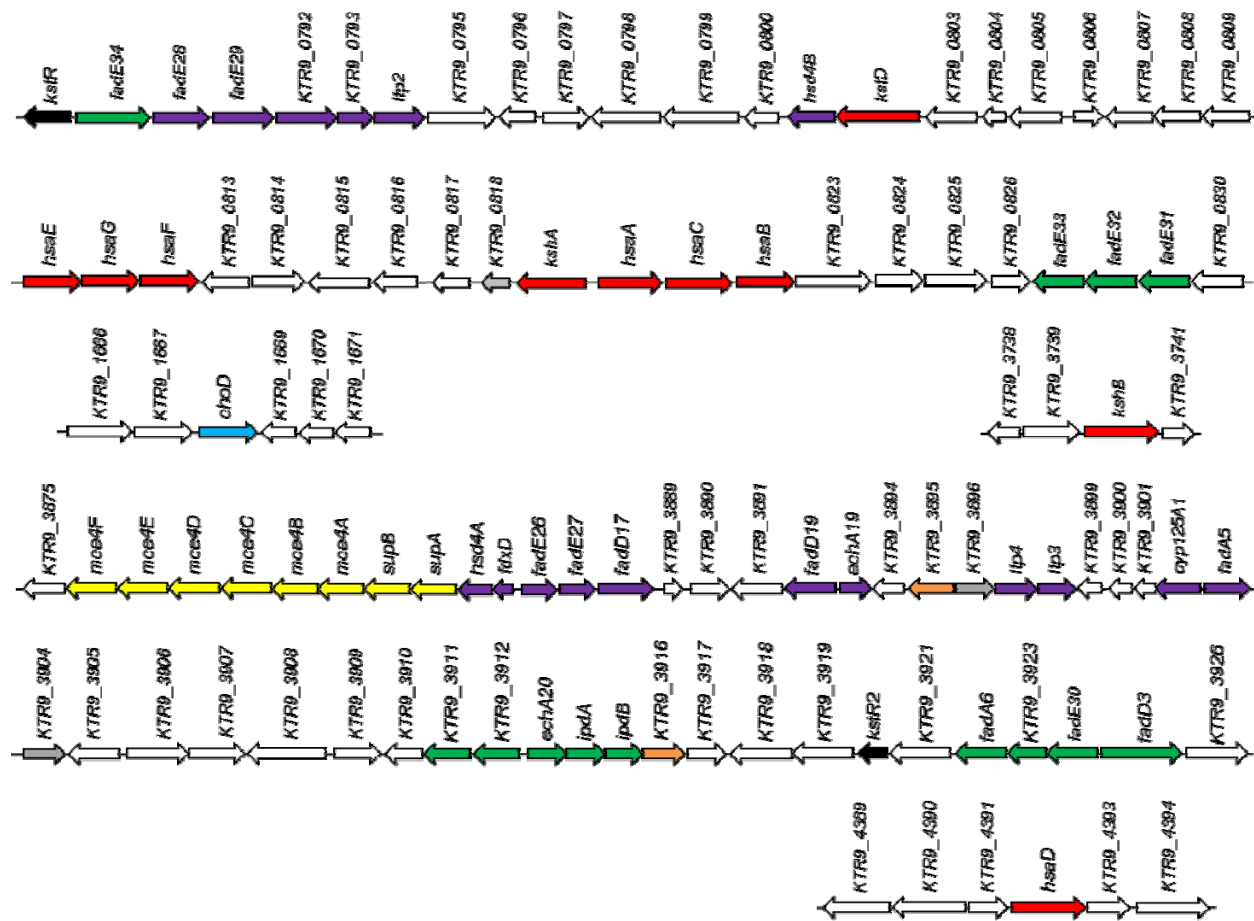

Figure S2. Predicted cholesterol catabolic genes in KTR9. Most of the genes are arranged in two clusters spanning KTR9\_0788 to KTR9\_0829 and KTR9\_3876 to KTR9\_3925, respectively. Three other genes occur elsewhere in the genome. Genes are color-coded as follows: red, genes involved in degradation of rings A and B; purple, genes involved in side chain degradation; green, genes involved in degradation of rings C and D; yellow, genes comprising the Mce4 cholesterol importer; black, transcriptional regulator; blue, *choD*, encoding a proposed cholesterol oxidase; orange, encoding oxidoreductases of unknown function conserved in the RHA1 and *Mtb* cholesterol catabolic cluster; grey, encoding conserved hypothetical protein; white, genes of no known function in cholesterol catabolism.

## **Supplemental References**

**S1. Griffin, J.E., J.D. Gawronski, M.A. Dejesus, T.R. Ioerger, B.J. Akerley, and C.M. Sassetti.** 2011. High-resolution phenotypic profiling defines genes essential for mycobacterial growth and cholesterol catabolism. *PLoS Pathog.* **7**:e1002251.

**S2. Ouellet, H., J.B. Johnston, and P.R. Ortiz de Montellano.** 2011. Cholesterol catabolism as a therapeutic target in *Mycobacterium tuberculosis*. *Trends Microbiol.* **19**:530-539.
